Development 133, 4794 (2006) doi:10.1242/dev.02714

**Capicua regulates follicle cell fate in the *Drosophila* ovary through repression of *mirror***  
**Matthew R. Atkey, Jean-François Boisclair Lachance, Monica Walczak, Tahlia Rebello and Laura A. Nilson**

There was an error published in *Development* **133**, 2115-2123.

Throughout this article and in the references, Trudi Schüpbach's name appeared incorrectly as Schübach.

We apologize to the authors and readers for this mistake.
